# Supplementary material for: Defective crystalline molybdenum phosphides as bifunctional catalysts for hydrogen evolution and hydrazine oxidation reactions during water splitting
Source: Royal Society of Chemistry journal article supplement (doi:10.1039/c9qi01005j), 2019-01-01
Supplement: c9qi01005j1.pdf [file c9qi01005j1.pdf]

## Electronic Supplementary Information

### Defective crystalline molybdenum phosphides as bifunctional catalysts for hydrogen evolution and hydrazine oxidation reactions in water splitting

Yan Gao <sup>a, §</sup>, Qiang Wang <sup>b, §</sup>, Ting He <sup>d</sup>, Jun-Ye Zhang <sup>d</sup>, Hao Sun <sup>a</sup>, Bin Zhao <sup>a</sup>, Bao Yu Xia <sup>d</sup>, Ya Yan <sup>a, \*</sup>, Yuan Chen <sup>c, \*</sup>

<sup>a</sup> School of Materials Science & Engineering, University of Shanghai for Science and Technology, 516 Jungong Road, Shanghai 200093, R China

<sup>b</sup> Department of Applied Chemistry, School of Chemistry and Molecular Engineering, Nanjing Tech University, Nanjing 211880, P. R. China

<sup>c</sup> School of Chemical and Biomolecular Engineering, The University of Sydney, Sydney, New South Wales 2006, Australia

<sup>d</sup> School of Chemistry and Chemical Engineering, Wuhan National Laboratory for Optoelectronics, Huazhong University of Science and Technology (HUST), 1037 Luoyu Road, Wuhan 430074, PR China

§ These authors contributed equally.

\*Corresponding author. E-mail: yanya@usst.edu.cn (Y. Yan), yuan.chen@sydney.edu.au (Y. Chen)

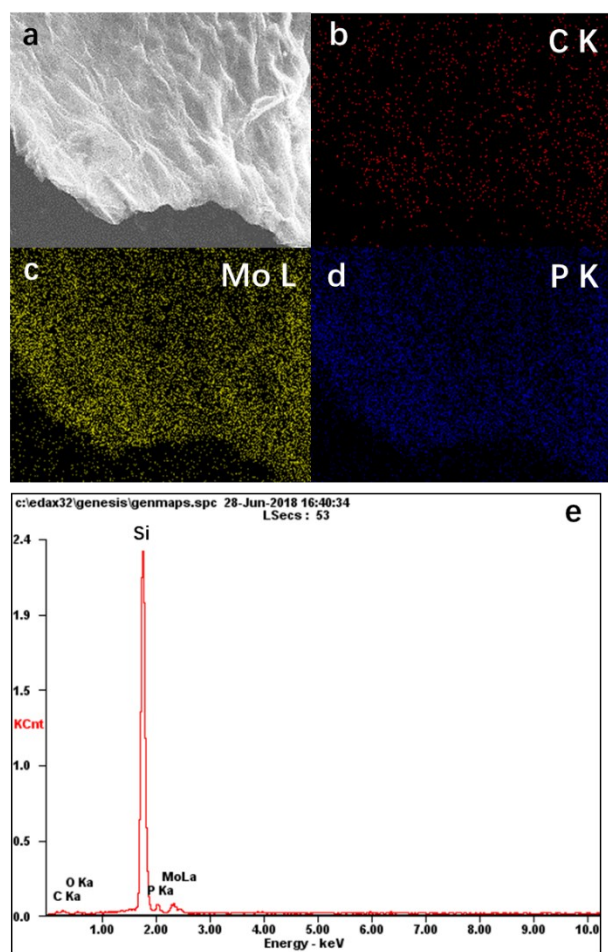

**Fig. S1.** An SEM image (a) and the corresponding EDS maps (b-d) and an EDS spectrum (e) of D-MoP/rGO. The Si peak in (e) comes from the Si wafer support.

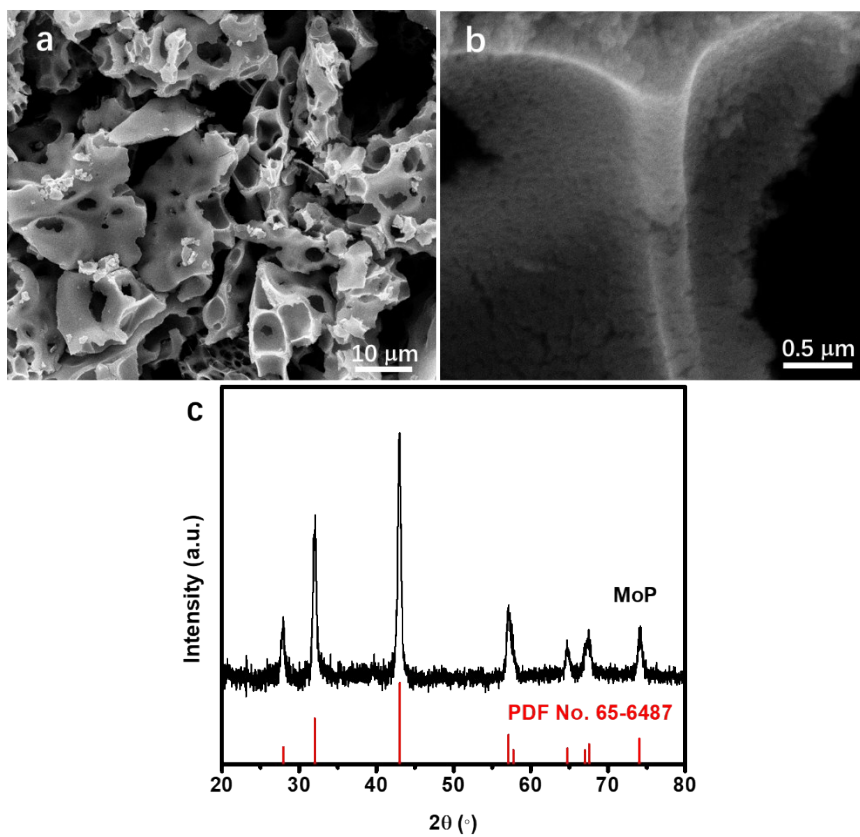

**Fig. S2.** (a,b) SEM images and (c) an XRD pattern of bulk MoP.

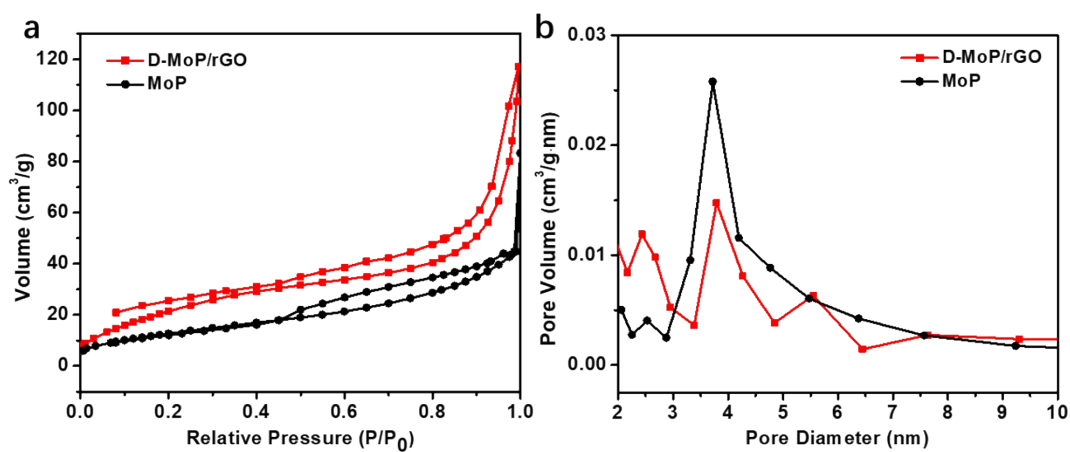

**Fig. S3.** (a)  $N_2$  adsorption-desorption isotherms and (b) the pore size distribution of D-MoP/rGO in comparison with a bulk MoP sample.

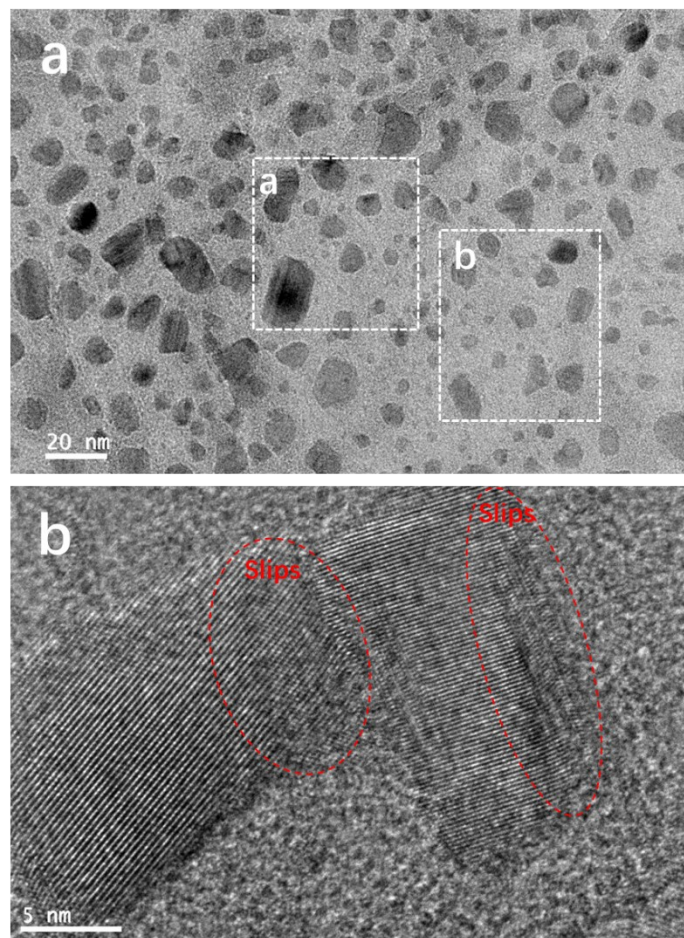

**Fig. S4.** The TEM images of D-MoP/rGO. (a) Figure 2a and 2b are extracted from the selected area (white squares) in this image. b) The HRTEM image of D-MoP/rGO show slips in the crystal structure of MoP.

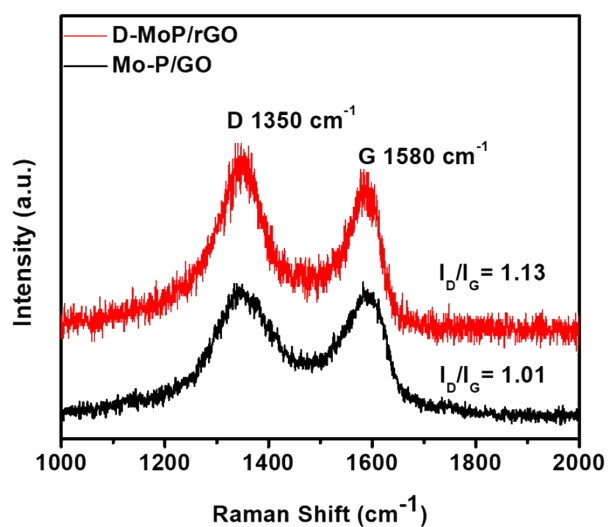

**Fig. S5.** Raman spectra of D-MoP/rGO and the GO supported precursors (donated as Mo-P/GO).

The Raman spectrum of D-MoP/rGO exhibits typical D and G bands of carbon materials at 1370 and 1594 cm<sup>-1</sup>, respectively. The I<sub>D</sub>/I<sub>G</sub> ratio of D-MoP/rGO at 1.13 is much higher than that of Mo-P/GO at 1.01. This demonstrates the present of the defects on the rGO after thermal annealing along with optimized conductivity of the hybrid.

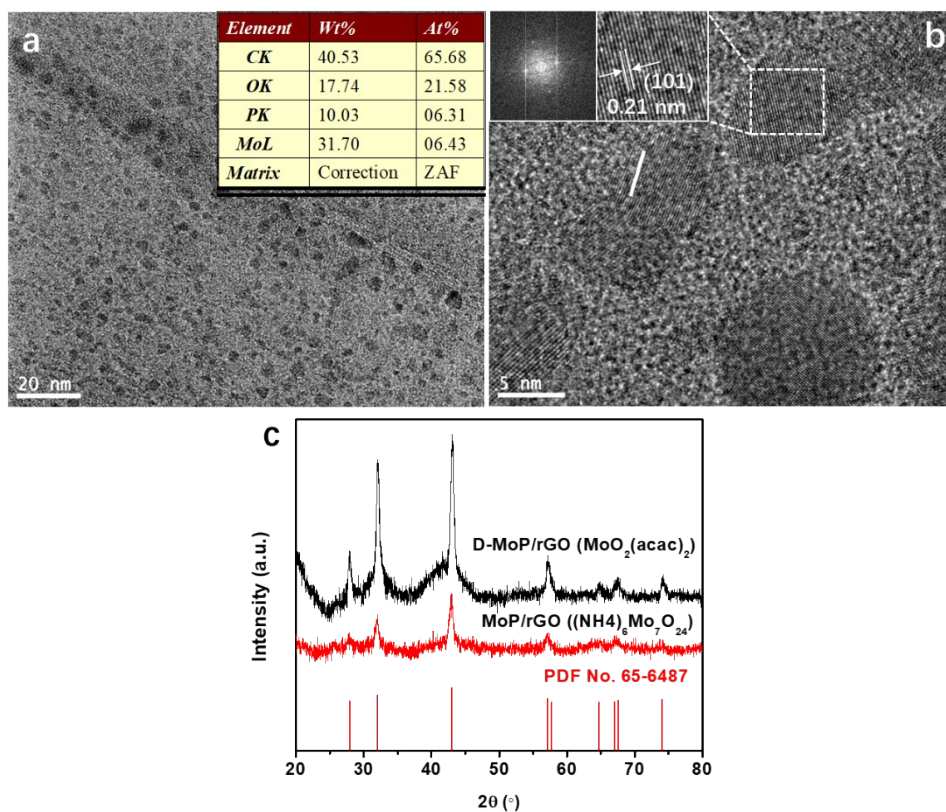

**Fig. S7.** Characterization of MoP/rGO synthesized by using  $(\text{NH}_4)_6\text{Mo}_7\text{O}_{24}$  as the Mo precursor. (a) TEM and (b) HRTEM images of MoP/rGO. The inset of (a) is the EDX elemental distribution. (c) XRD patterns. (d) *i*R-corrected LSV polarization curves of MoP/rGO, D-MoP/rGO, and Pt/C in 1.0 M KOH.

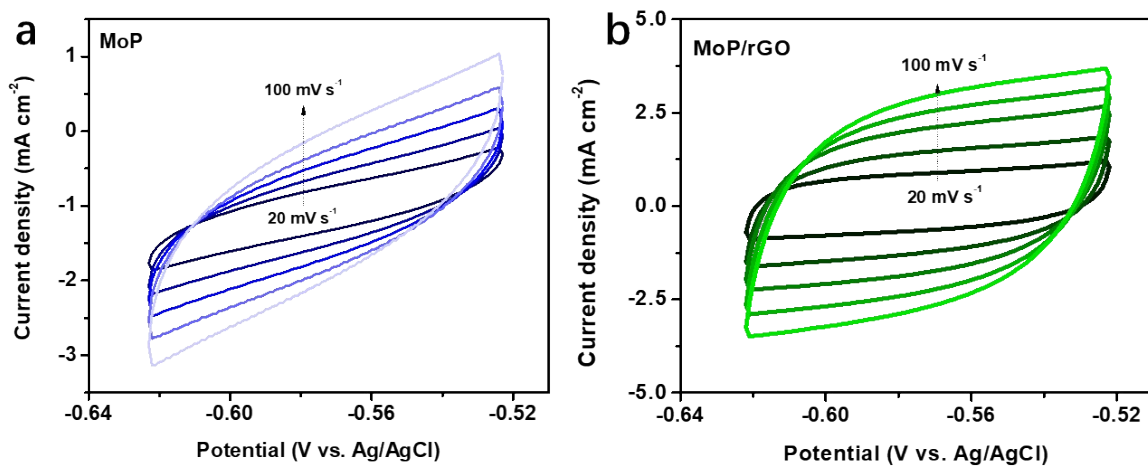

**Fig. S7.** CVs of bulk MoP and MoP/rGO in a non-faradaic capacitance current range at the scan rates of 20, 40, 60, 80 and 100 mV s<sup>-1</sup>.

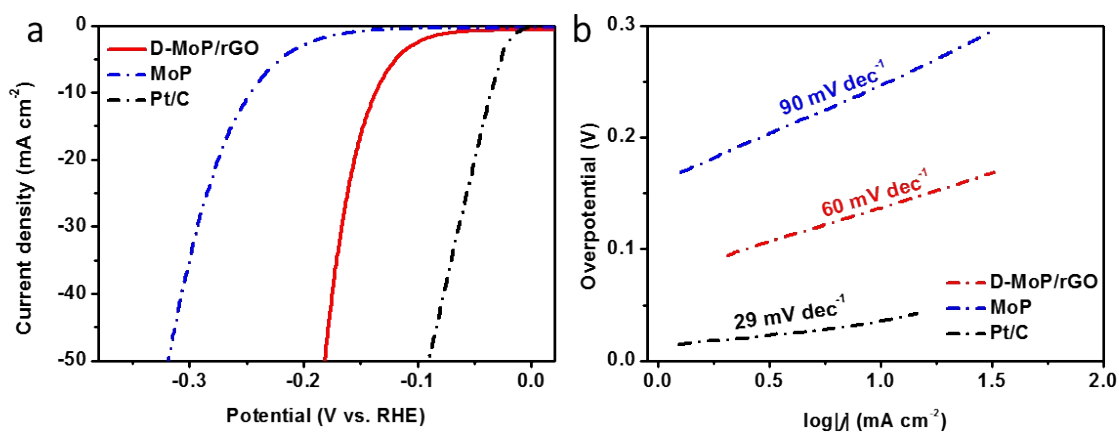

**Fig. S8.** (a) HER LSV polarization curves of D-MoP/rGO, MoP, and Pt/C in 0.5 M H<sub>2</sub>SO<sub>4</sub> and (b) the corresponding Tafel plots.

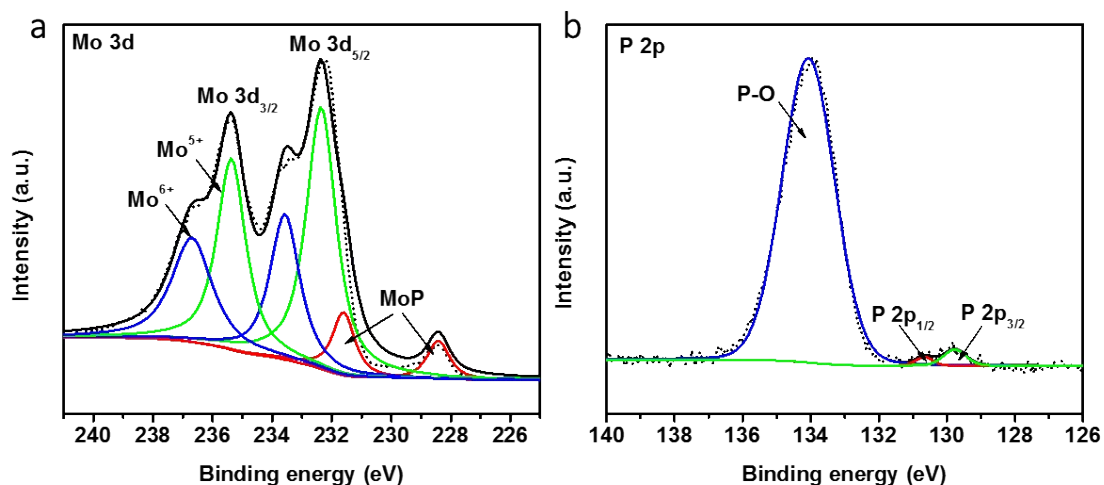

**Fig. S9.** XPS spectra of D-MoP/rGO after the HER test. (a) Mo 3d and (b) P 2p spectra.

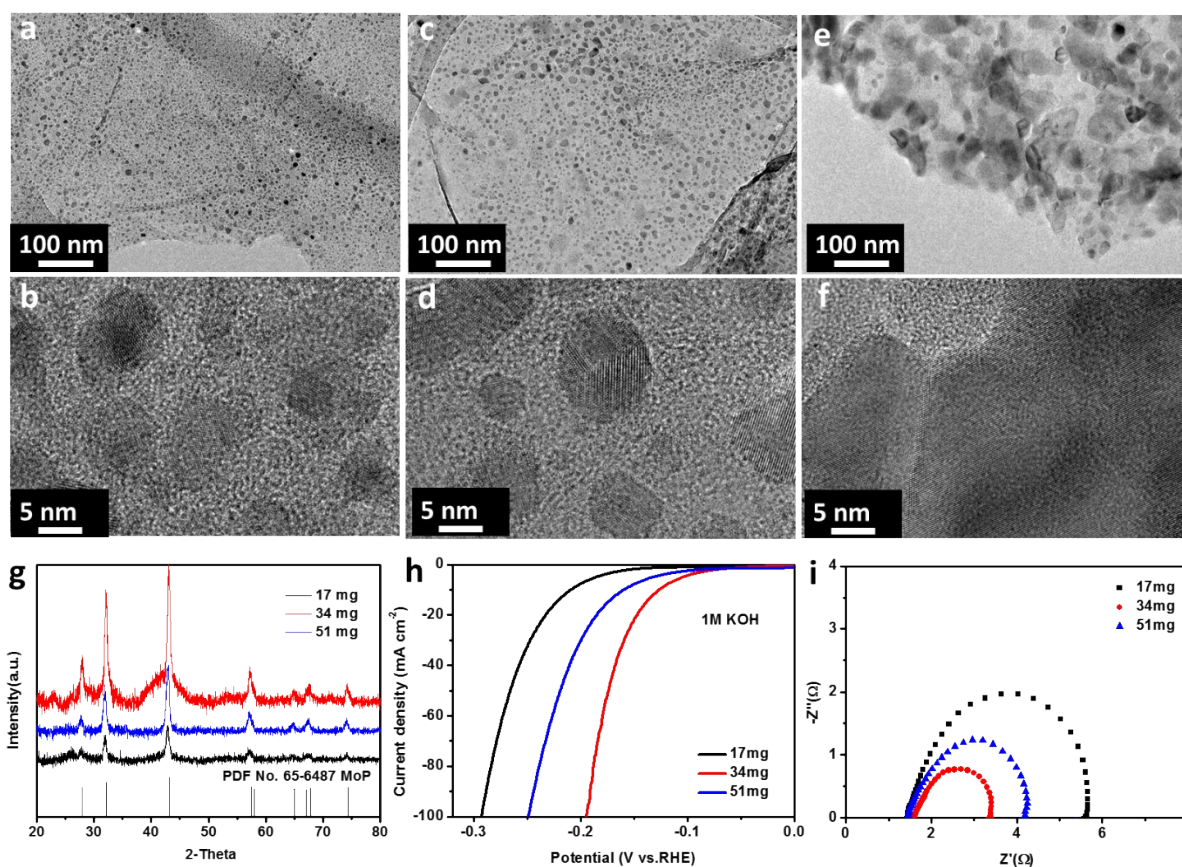

**Fig. S10.** TEM images of crystalline MoP/rGO synthesized using different amount of MoO<sub>2</sub>(acac)<sub>2</sub>, (a,b) 17 mg, (c,d) 34 mg, (e,f) 51 mg. (g) XRD patterns of these samples. (h) HER LSV polarization curves of these samples in 1.0 M KOH and (i) their corresponding Nyquist plots.



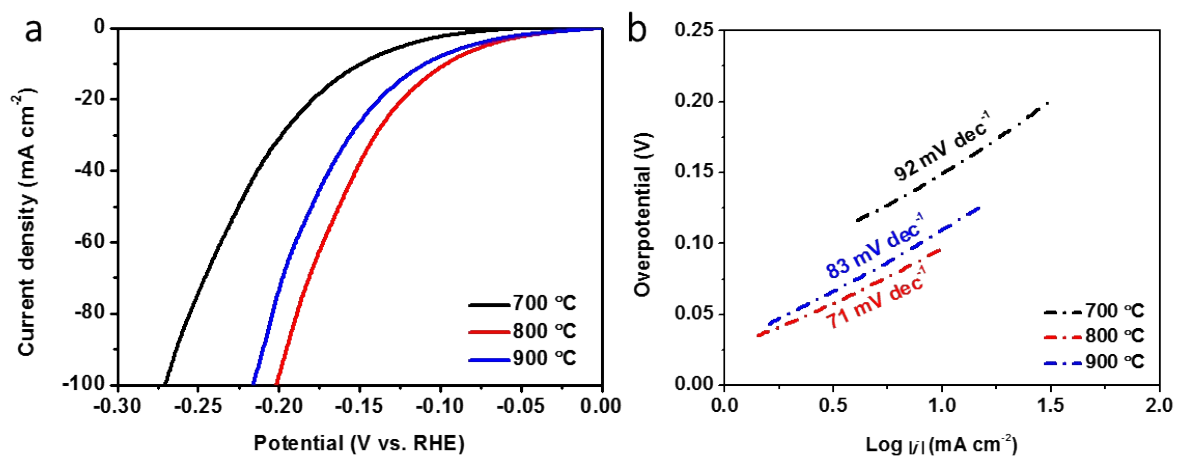

**Fig. S11.** HER LSV polarization curves of D-MoP/rGO synthesized at different annealing temperatures (electrolyte: 1.0 M KOH)

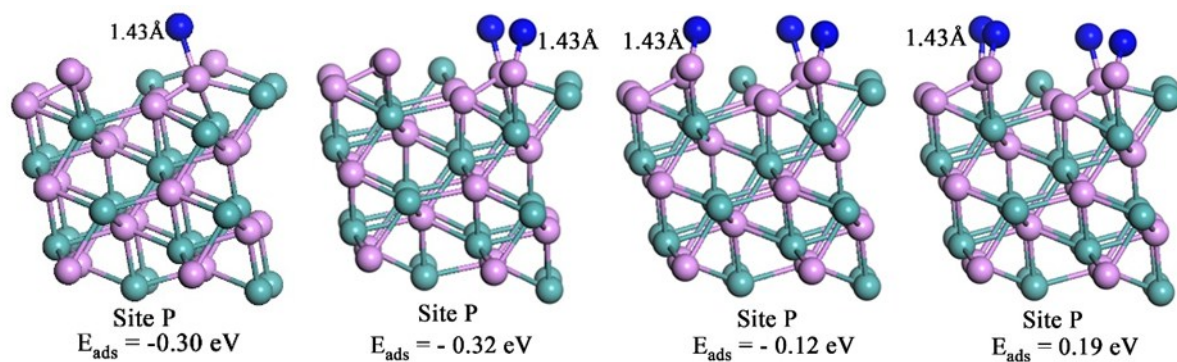

**Fig. S12.** Adsorption models of 1H, 2H, 3H, 4H atoms on MoP (111)-Mo surfaces.

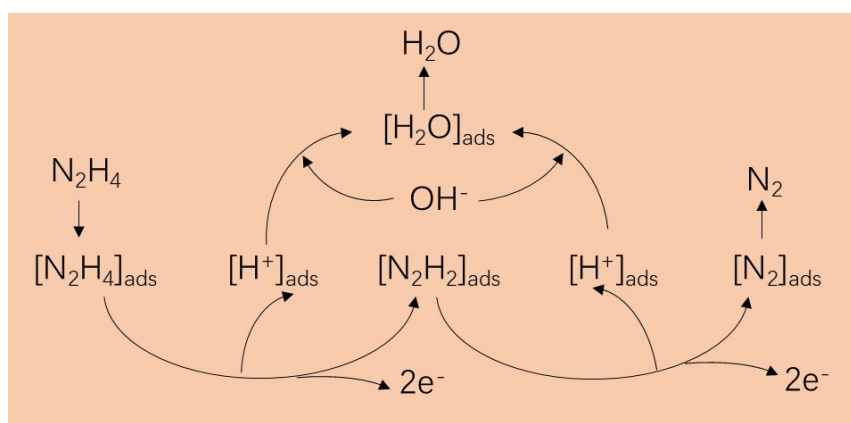

**Fig. S13.** Schematic illustration of the proposed reaction steps for hydrazine oxidation on D-MoP/rGO.

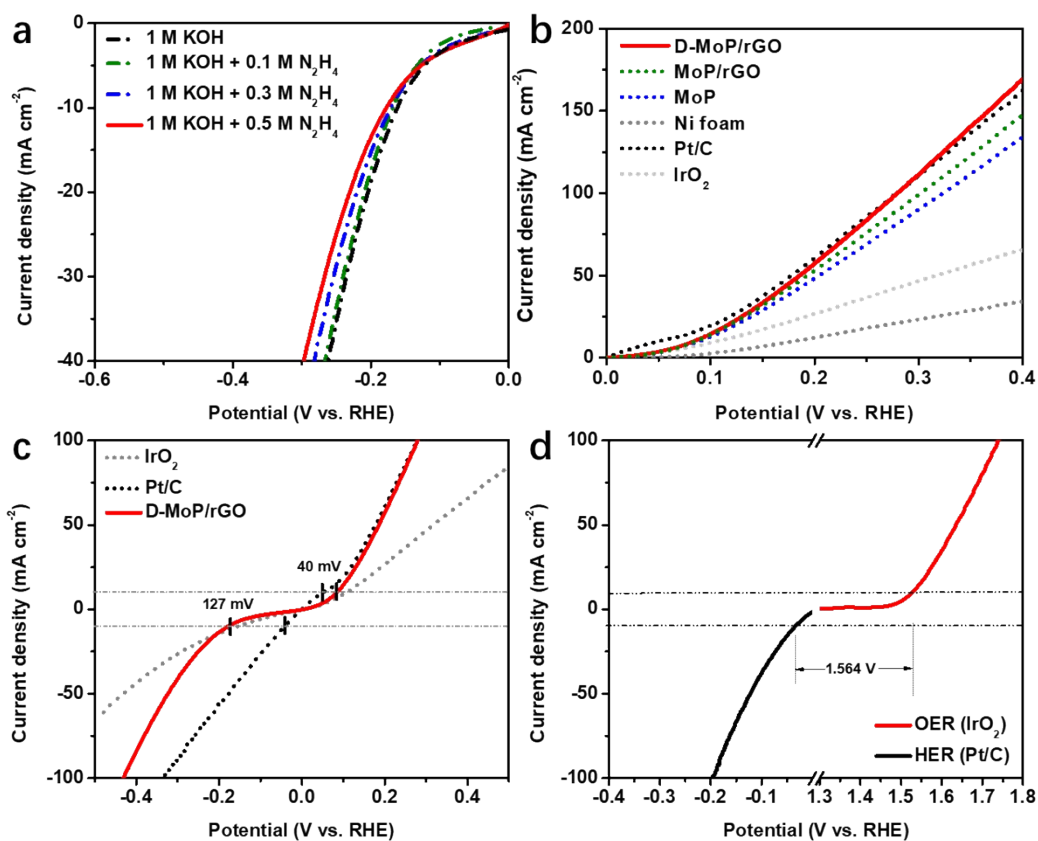

**Figure S14.** (a) HER LSV polarization curves of D-MoP/rGO in 1.0 M KOH containing different amount of hydrazine. (b) LSV polarization curves of various catalysts for the HER/HzOR couple in 1.0 M KOH containing 0.5 M N<sub>2</sub>H<sub>4</sub>. (c) LSV polarization curves of D-MoP/rGO, Pt/C and IrO<sub>2</sub> for the HER/HzOR couple in 1.0 M KOH containing 0.5 M N<sub>2</sub>H<sub>4</sub>. (d) LSV polarization curves of Pt/C (HER) and IrO<sub>2</sub> (OER) in 1.0 M KOH.

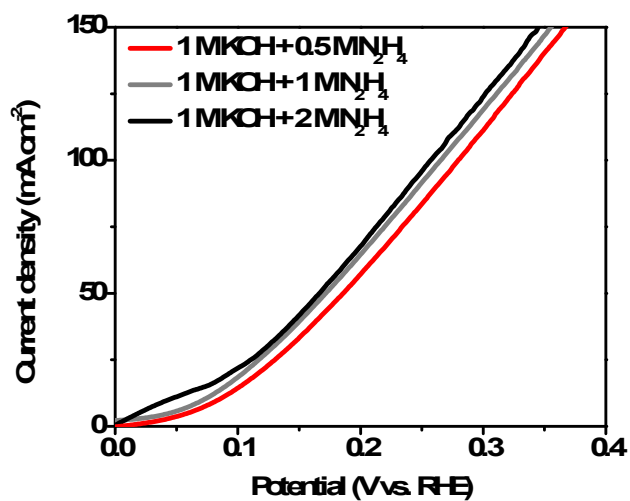

**Fig. S15.** LSV polarization curves of D-MoP/rGO for hydrazine oxidation in 1.0 M KOH containing hydrazine at different concentrations.

**Table S1.** HER activities of Mo- and P- based electrocatalysts under alkaline (1.0M KOH) media.

| Catalysts                                            | Electrolyte      | $\eta_{\text{onset}}$<br>(mV) | Tafel slope<br>(mV dec <sup>-1</sup> ) | $j_{\text{geo}}$<br>(mA cm <sup>-2</sup> )                                     | Loading<br>(mg cm <sup>-2</sup> ) | Reference                                              |
|------------------------------------------------------|------------------|-------------------------------|----------------------------------------|--------------------------------------------------------------------------------|-----------------------------------|--------------------------------------------------------|
| <b>D-MoP/rGO</b>                                     | <b>1.0 M KOH</b> | <b>38</b>                     | <b>71</b>                              | <b>10 @<math>\eta</math>=<br/>122 mV<br/>30 @<math>\eta</math>=<br/>158 mV</b> | <b>1.5</b>                        | <b><i>This work</i></b>                                |
| MoP/NC                                               | 1.0 M KOH        | -                             | 50                                     | 10 @ $\eta$ =<br>170 mV                                                        | ~0.56                             | <i>Appl. Catal., B.</i> <b>2019</b> ,<br>245, 656      |
| MoP/CNTs-<br>700                                     | 1.0 M KOH        | 34                            | 73                                     | 10 @ $\eta$ =<br>86 mV                                                         | 0.5                               | <i>Adv. Funct. Mater.</i> <b>2018</b> ,<br>28, 1706523 |
| MoP-RGO                                              | 1.0 M KOH        | -                             | 62                                     | 10 @ $\eta$ =<br>150 mV                                                        | 0.42                              | <i>Electrochim. Acta</i> , <b>2017</b> ,<br>232, 254   |
| MoP                                                  | 1.0 M KOH        | 50                            | -                                      | 30 @ $\eta$ =<br>180 mV                                                        | 0.86                              | <i>Energy Environ. Sci.</i><br><b>2014</b> , 7, 2624   |
| MoCx nano-<br>octahedrons                            | 1.0 M KOH        | 80                            | 59                                     | 10 @ $\eta$ =<br>151 mV                                                        | 0.8                               | <i>Nat. Commun.</i> <b>2015</b> ,<br>6,6512            |
| Ni-MoS <sub>2</sub>                                  | 1.0 M KOH        | 45                            | 60                                     | 10 @ $\eta$ =<br>98 mV                                                         | 0.89                              | <i>Energy Environ. Sci.</i><br><b>2016</b> , 9, 2789   |
| MoO <sub>2</sub>                                     | 1.0 M KOH        | 0                             | 41                                     | 10 @ $\eta$ =<br>10 mV                                                         | 2.9                               | <i>Adv. Mater.</i> , 2016, 28,<br>3785-3790            |
| FeP NAs/CC                                           | 1.0 M KOH        | 86                            | 146                                    | 10 @ $\eta$ =<br>218 mV                                                        | 1.5                               | <i>ACS Catal.</i> <b>2014</b> , 4, 4065                |
| Ni <sub>5</sub> P <sub>4</sub> (pellet)              | 1.0 M NaOH       | -                             | 98                                     | 10 @ $\eta$ =<br>49 mV                                                         | 50 mg in 6<br>mm pellet           | <i>Energy Environ. Sci.</i><br><b>2015</b> , 8, 1027   |
| Ni <sub>2</sub> P(pellet)                            | 1.0 M NaOH       | -                             | 118                                    | 10 @ $\eta$ =<br>69 mV                                                         |                                   |                                                        |
| Porous Co<br>phosphide/Co<br>phosphate<br>thin film  | 1.0 M KOH        | -                             | -                                      | 30 @ $\eta$ =<br>430 mV                                                        | 0.1                               | <i>Adv. Mater.</i> <b>2015</b> , 27,<br>3175           |
| Co-P film                                            | 1.0 M KOH        | -                             | 42                                     | 10 @ $\eta$ =<br>94 mV                                                         | Co=2.52<br>P=0.19                 | <i>Angew. Chem. Int. Ed.</i><br><b>2015</b> , 54, 6251 |
| Ni <sub>0.33</sub> Co <sub>0.67</sub> S <sub>2</sub> | 1.0 M KOH        | 50                            | 118                                    | 10 @ $\eta$ =<br>88 mV                                                         | 0.3                               | <i>Adv. Energy Mater.</i> <b>2015</b> ,<br>5, 1402031  |

**Table S2.** The values of  $\Delta E_{H^*}$ ,  $\Delta E_{ZPE(H^*)}$ ,  $\Delta E_{ZPE}$  and  $\Delta G_{H^*}$  of  $H^*$  at the surface of MoP (111) and MoP (111)-Mo.

|              |    | $\Delta E_{H^*}/\text{eV}$ | $\Delta E_{ZPE(H^*)}/\text{eV}$ | $\Delta E_{ZPE}/\text{eV}$ | $\Delta G_{H^*}/\text{eV}$ |
|--------------|----|----------------------------|---------------------------------|----------------------------|----------------------------|
| MoP (111)    | 1H | -0.300813                  | 0.206958                        | 0.069122                   | -0.43                      |
|              | 2H | -0.292545                  | 0.413850                        | 0.276014                   | -0.22                      |
|              | 3H | -0.097355                  | 0.616084                        | 0.478248                   | 0.18                       |
|              | 4H | -0.068716                  | 0.816629                        | 0.678793                   | 0.41                       |
| MoP (111)-Mo | 1H | -0.299527                  | 0.210584                        | 0.072748                   | -0.43                      |
|              | 2H | -0.324443                  | 0.420035                        | 0.282199                   | -0.24                      |
|              | 3H | -0.120011                  | 0.622901                        | 0.485064                   | 0.16                       |
|              | 4H | 0.193886                   | 0.792931                        | 0.655095                   | 0.65                       |

**Table S3.** Cell voltage of different electro-catalysts for overall water splitting.

| Catalysts                             | Electrolyte                                            | Cell voltage (V) | Current density (mA cm <sup>-2</sup> ) | Durability (h) | Reference                                              |
|---------------------------------------|--------------------------------------------------------|------------------|----------------------------------------|----------------|--------------------------------------------------------|
| <b>D-MoP/rGO</b>                      | <b>1.0 M KOH<br/>+0.5 M N<sub>2</sub>H<sub>4</sub></b> | <b>0.74</b>      | <b>100</b>                             | <b>12</b>      | <b><i>This work</i></b>                                |
| Cu <sub>3</sub> P/CF                  | 1.0 M KOH<br>+0.5 M N <sub>2</sub> H <sub>4</sub>      | 0.4              | 10                                     | 3              | <i>Inorg. Chem. Front.</i> <b>2017</b> , 4, 420        |
| Ni <sub>2</sub> P/NF                  | 1.0 M KOH<br>+0.5 M N <sub>2</sub> H <sub>4</sub>      | 0.45             | 100                                    | 10             | <i>Angew. Chem. Int.Ed.</i> <b>2017</b> , 129, 860-864 |
| CoP/TiM                               | 1.0 M KOH<br>+0.1 M N <sub>2</sub> H <sub>4</sub>      | 0.3              | 40                                     | 5.5            | <i>ChemElectroChem</i> <b>2017</b> , 4, 481            |
| Tubular CoSe <sub>2</sub> nanosheet   | 1.0 M KOH<br>+0.5 M N <sub>2</sub> H <sub>4</sub>      | 0.164            | 10                                     | 14             | <i>Angew. Chem. Int. Ed.</i> <b>2018</b> , 57, 7649    |
| Ni <sub>2</sub> P NF/CC               | 1 M KOH<br>+0.5 M urea                                 | 1.35             | 50                                     | -              | <i>J. Mater. Chem. A</i> <b>2017</b> , 5, 3208         |
| Co-P/rGO                              | 1.0 M NaOH                                             | 1.70             | 10                                     | -              | <i>Chem. Sci.</i> , <b>2016</b> , 7, 1690              |
| FeP NTs                               | 1.0 M KOH                                              | 1.69             | 10                                     | 14             | <i>Chem. Eur. J.</i> <b>2015</b> , & 21, 1             |
| Cu@NiFe LDH                           | 1.0 M KOH                                              | 1.54             | 10                                     | 48             | <i>Energy Environ. Sci.</i> <b>2017</b> , 10, 1820     |
| NiFeOx/CFP                            | 1.0 M KOH                                              | 1.51             | 10                                     | 200            | <i>Nat. Commun.</i> <b>2015</b> , 6, 7261              |
| Co <sub>1</sub> Mn <sub>1</sub> CH/NF | 1.0 M KOH                                              | 1.68             | 10                                     | -              | <i>J. Am. Chem. Soc.</i> <b>2017</b> , 139, 8320       |
